# Supplementary material
Source: PubMed Central journal article supplement (PMC6906930)
Supplement: ma9b01439_si_001.pdf [file ma9b01439_si_001.pdf]

# **Characterization of UV-cured methacrylate networks: from photopolymerization to ultimate mechanical properties**

R. Anastasio<sup>1,2,+</sup>, W. Peerbooms<sup>1,+</sup>, R. Cardinaels<sup>1</sup>, L.C.A. van Breemen<sup>1,\*</sup>

<sup>1</sup> Department of Mechanical Engineering, Materials Technology Institute, Eindhoven University of Technology, P.O. Box 513, 5600 MB, Eindhoven, the Netherlands

<sup>2</sup> Brightlands Materials Center (BMC), P.O. Box 18, 6160 MD Geleen, the Netherlands

+ These authors contributed equally to this work

---

\*Author to whom correspondence should be addressed. E-mail: L.C.A.v.Breemen@tue.nl Tel: +31(0)40 247 3092

## Supporting Information

A sensitivity study is performed for the model to illustrate the effect of changing model and fitting parameters on the model prediction. Fig. S1 shows the effect of changing  $k_{p0}/k_{t0}^{0.5}$  on the prediction of monomer conversion. It can be seen that the initial slope of the curve changes, whereas the shape of the curve stays the same. In Fig. S2 the change in  $k_p$ ,  $k_t$  and initiator efficiency,  $f$ , is shown with respect to their initial values as function of conversion.

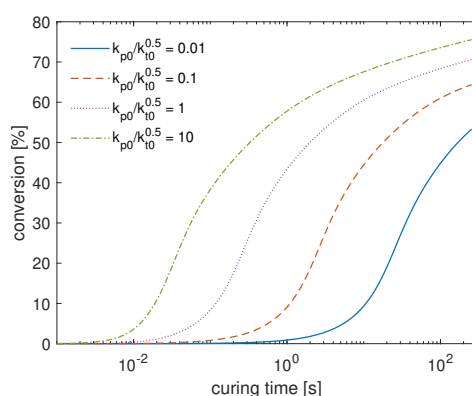

Figure S1: Effect of changing  $k_{p0}/k_{t0}^{0.5}$ , on the prediction of monomer conversion. The model parameters listed in Table 1 are used.

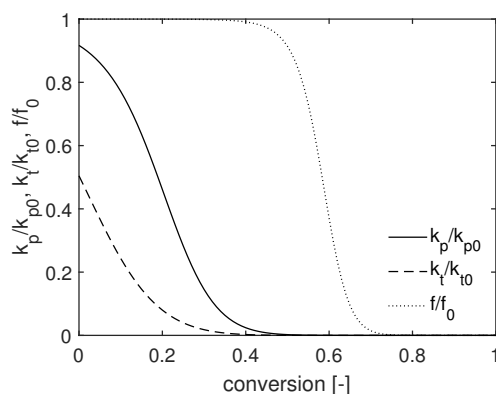

Figure S2: Conversion dependence of the rate constant of propagation,  $k_p$ , termination,  $k_t$  and initiator efficiency,  $f$  with respect to their initial values in the UV-cured resin. The model parameters listed in Table 1 are used.

In Fig. S3 the effect of changing the critical conversion for propagation and initiation,  $x_{crp}$  and  $x_{crl}$  respectively, on the monomer conversion is shown. The slope of the curves becomes less steep at lower

conversion for lower  $x_{\text{crp}}$ , which is logical because the propagation rate starts decreasing at lower  $x_{\text{crp}}$ , leading to a lower final conversion. A similar trend is observed for the  $x_{\text{crf}}$ , where the curves start to flatten out at a lower conversion for lower  $x_{\text{crf}}$ .

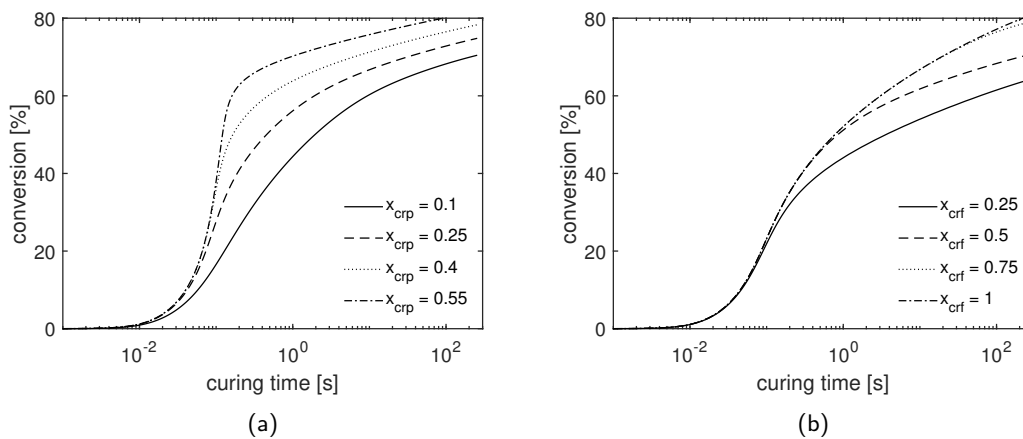

Figure S3: Sensitivity of fitting parameters: effect of changing  $x_{\text{crp}}$  (a) and  $x_{\text{crf}}$  (b) on the predicted monomer conversion. The model parameters listed in Table 1 are used.

## List of Figures

|    |                                                                                                                                                                                                                                          |   |
|----|------------------------------------------------------------------------------------------------------------------------------------------------------------------------------------------------------------------------------------------|---|
| S1 | Effect of changing $k_{p0}/k_{t0}^{0.5}$ , on the prediction of monomer conversion. The model parameters listed in Table 1 are used. . . . .                                                                                             | 2 |
| S2 | Conversion dependence of the rate constant of propagation, $k_p$ , termination, $k_t$ and initiator efficiency, $f$ with respect to their initial values in the UV-cured resin. The model parameters listed in Table 1 are used. . . . . | 2 |
| S3 | Sensitivity of fitting parameters: effect of changing $x_{crp}$ (a) and $x_{crf}$ (b) on the predicted monomer conversion. The model parameters listed in Table 1 are used. . . . .                                                      | 3 |
